# Supplementary material for: An electrophoretic DNA extraction device using a nanofilter for molecular diagnosis of pathogens
Source: Royal Society of Chemistry journal article supplement (doi:10.1039/c9nr10675h), 2020-01-01
Supplement: c9nr10675h1.pdf [file c9nr10675h1.pdf]

### Supplementary information

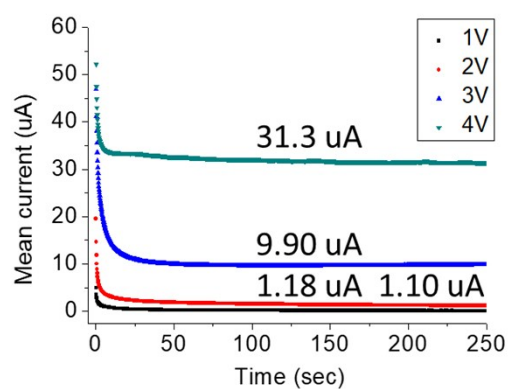

**Figure S1.** Ion current trace for 250 seconds flowing in the system from 1 to 4 V. The displayed number is the average value of the current flowing during the last 30 seconds.

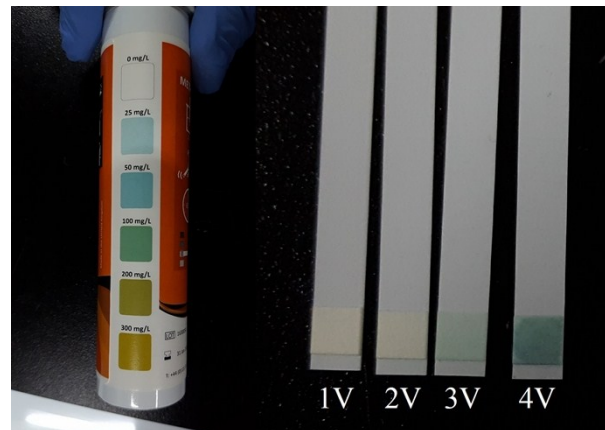

**Figure S2.** Simplified test strip results for HOCl detection. Reactive chlorine ions were detected at a concentration higher than 25 mg/L at 3 and 4 V, but not at 1 and 2 V.
